# Supplementary material for: Karyotype variation, spontaneous genome rearrangements affecting chemical insensitivity, and expression level polymorphisms in the plant pathogen Phytophthora infestans revealed using its first chromosome-scale assembly
Source: PubMed Central journal article supplement (PMC9584435; doi:10.1371/journal.ppat.1010869), 2022-10-10
Supplement: ppat.1010869.s001.pdf [file ppat.1010869.s001.pdf]

**S1 Table.** Current assemblies of *Phytophthora infestans*

| Strain  | Technology                                                                        | Bases in assembly (Mb) | N50 (kb) | Scaffolds | Predicted genes   | Reference  |
|---------|-----------------------------------------------------------------------------------|------------------------|----------|-----------|-------------------|------------|
| 1306    | PacBio, Illumina, Bionano optical map, Dovetail (proximity ligation), linkage map | 247                    | 970      | 632       | 19,981            | this study |
| T30-4   | Sanger                                                                            | 190 <sup>a</sup>       | 44.5     | 4,921     | 17,797            | [1]        |
| KR_1_A1 | Oxford Nanopore, Illumina                                                         | 201                    | 291      | 1,510     | 20,172            | [2]        |
| KR_1_A2 | Oxford Nanopore, Illumina                                                         | 231                    | 152      | 3,344     | 23,771            | [2]        |
| RC1-10  | PacBio                                                                            | 203                    | 120      | 2,902     | n.d. <sup>b</sup> | [3]        |

<sup>a</sup>Total predicted size of 229 Mb.

<sup>b</sup>Not determined.

## References

1. Haas BJ, Kamoun S, Zody MC, Jiang RH, Handsaker RE, Cano LM, et al. Genome sequence and analysis of the Irish potato famine pathogen *Phytophthora infestans*. *Nature*. 2009;461(7262):393-8.
2. Lee Y, Cho KS, Seo JH, Sohn KH, Prokchorchik M. Improved genome sequence and gene annotation resource for the potato late blight pathogen *Phytophthora infestans*. *Mol Plant Microbe In*. 2020;33(8):1025-8.
3. Ayala-Usma DA, Cardenas M, Guyot R, De Mares MC, Bernal A, Munoz AR, et al. A whole genome duplication drives the genome evolution of *Phytophthora betacei*, a closely related species to *Phytophthora infestans*. *BMC Genomics*. 2021;22(1):795.
