# Supplementary material for: Karyotype variation, spontaneous genome rearrangements affecting chemical insensitivity, and expression level polymorphisms in the plant pathogen Phytophthora infestans revealed using its first chromosome-scale assembly
Source: PubMed Central journal article supplement (PMC9584435; doi:10.1371/journal.ppat.1010869), 2022-10-10
Supplement: ppat.1010869.s003.pdf [file ppat.1010869.s003.pdf]

**S3 Table.** Genes differentially expressed between polyploids and diploids

| 1306 Gene Name | T30-4 Gene Name | Polyploid/diploid (Log 2) | FDR (BH) | Predicted function                        | Mean RPKM polyploid | Mean RPKM diploid |
|----------------|-----------------|---------------------------|----------|-------------------------------------------|---------------------|-------------------|
| PI_03chr0093   | PITG_15864      | 2.23                      | 2E-05    | none                                      | 33.1                | 7.06              |
| PI_03chr0302   | PITG_08304      | 1.54                      | 8E-05    | Cyclic nucleotide-dependent kinase        | 125.4               | 43.1              |
| PI_03chr2340   | PITG_01526      | 0.87                      | 1E-04    | MAP kinase kinase                         | 36.3                | 19.9              |
| PI_03chr2063   | PITG_01789      | 0.79                      | 2E-04    | none                                      | 26.9                | 15.6              |
| PI_03chr2059   | PITG_01792      | 1.33                      | 3E-04    | none                                      | 24.1                | 9.6               |
| PI_02chr0877   | PITG_04935      | 1.2                       | 4E-04    | Metallophosphatase                        | 18.9                | 8.2               |
| PI_02chr1741   | PITG_03669      | 1.03                      | 4E-04    | none                                      | 19.1                | 9.3               |
| PI_02chr3399   | PITG_18446      | -0.47                     | 4E-04    | 26SD proteasome regulatory subunit 6b     | 117.6               | 162.9             |
| PI_03chr1778   | PITG_01850      | 1.06                      | 4E-04    | 125 kD kinesin                            | 9.5                 | 4.6               |
| PI_09chr1255   | PITG_02501      | 3.95                      | 4E-04    | E3 ubiquitin-protein ligase               | 375.5               | 24.3              |
| PI_03chr0105   | PITG_15876      | 1.11                      | 4E-04    | SPRY domain protein                       | 20.6                | 9.6               |
| PI_04chr0062   | PITG_16427      | 2.33                      | 4E-04    | RxLR effector                             | 53.3                | 10.6              |
| PI_02chr1028   | PITG_04820      | 0.67                      | 5E-04    | none                                      | 76.6                | 48.1              |
| PI_03chr0111   | PITG_15884      | 0.88                      | 5E-04    | SMC chromosome segregation protein        | 17.5                | 9.5               |
| PI_06chr0053   | PITG_16315      | 0.85                      | 5E-04    | none                                      | 12.0                | 6.7               |
| PI_12chr0975   | PITG_06558      | -0.6                      | 5E-04    | none                                      | 14.2                | 21.5              |
| PI_02chr1761   | PITG_03654      | 1.33                      | 7E-04    | none                                      | 6.3                 | 2.5               |
| PI_13chr0413   | PITG_08235      | 1.18                      | 8E-04    | none                                      | 89.8                | 39.6              |
| PI_09chr1878   | PITG_19146      | 1.94                      | 8E-04    | Chromodomain-helicase-DNA binding protein | 40.1                | 10.4              |
| PI_03chr2034   | PITG_01816      | 1.15                      | 8E-04    | Kinase activator MOB1                     | 7.3                 | 3.3               |
| PI_12chr0560   | PITG_07887      | -0.67                     | 8E-04    | 26S proteasome regulatory subunit 6       | 71.8                | 114.3             |
| PI_13chr0414   | PITG_08236      | 1.56                      | 8E-04    | Heat shock transcription factor           | 167.6               | 56.8              |
| PI_077Fc020    | PITG_17400      | 1.73                      | 8E-04    | HSP40-class protein chaperone             | 225.7               | 68.0              |
| PI_03chr2037   | PITG_01814      | 0.71                      | 9E-04    | ELMO domain GTPase-activating protein     | 121.5               | 74.2              |
| PI_0131c021    | PITG_15818      | 0.92                      | 1E-03    | Acyl-CoA-binding protein                  | 47.6                | 25.1              |
| PI_02chr0876   | PITG_04936      | 0.79                      | 1E-03    | Zinc finger protein                       | 14.8                | 8.6               |
| PI_05chr0874   | PITG_09346      | 1.47                      | 1E-03    | none                                      | 33.1                | 12.0              |
| PI_06chr0233   | PITG_00208      | 0.64                      | 1E-03    | Never in mitosis A-related kinase         | 145.4               | 93.3              |
| PI_08chr0136   | PITG_13379      | 1.3                       | 1E-03    | RhoGEF domain protein                     | 59.5                | 24.2              |
| PI_06chr2476   | PITG_12619      | 1.23                      | 1E-03    | Crinkler family protein                   | 20.9                | 8.9               |
| PI_03chr1657   | PITG_01957      | 0.73                      | 1E-03    | Serine/threonine protein phosphatase      | 27.2                | 16.4              |
| PI_03chr0110   | PITG_15883      | 0.91                      | 1E-03    | Myotubularin-like phosphatase             | 11.6                | 6.2               |

|              |            |       |       |                                             |       |      |
|--------------|------------|-------|-------|---------------------------------------------|-------|------|
| PI_03chr1708 | PITG_01920 | 0.58  | 1E-03 | Ubiquitin carboxyl-terminal hydrolase       | 21.8  | 14.6 |
| PI_01chr4439 | PITG_12235 | 0.69  | 2E-03 | E3 ubiquitin-protein ligase                 | 40.9  | 25.3 |
| PI_08chr0320 | PITG_13286 | 1.8   | 2E-03 | none                                        | 80.7  | 23.2 |
| PI_04chr0062 | PITG_16418 | 2.53  | 2E-03 | RxLR protein                                | 35.6  | 6.2  |
| PI_03chr2276 | PITG_01589 | 0.66  | 2E-03 | none                                        | 21.6  | 13.7 |
| PI_06chr0390 | PITG_00190 | 0.62  | 2E-03 | FAD-binding protein                         | 20.6  | 13.4 |
| PI_09chr0313 | PITG_10763 | 1.65  | 2E-03 | Lysophospholipid acyltransferase            | 78.3  | 25.0 |
| PI_09chr0860 | PITG_02842 | 0.96  | 2E-03 | CDP-alcohol phosphatidyltransferase         | 40.4  | 20.8 |
| PI_07chr0247 | PITG_05729 | 1.75  | 2E-03 | none                                        | 71.6  | 21.3 |
| PI_05chr1297 | PITG_11583 | 2.86  | 2E-03 | Ring finger protein                         | 108.6 | 15.0 |
| PI_09chr0043 | PITG_18173 | 0.95  | 2E-03 | none                                        | 5.3   | 2.7  |
| PI_05chr1298 | PITG_11584 | 2.86  | 2E-03 | BAG domain proliferation and stress protein | 229.8 | 31.6 |
| PI_08chr0258 | PITG_21770 | 1.55  | 2E-03 | none                                        | 33.7  | 11.5 |
| PI_03chr1258 | PITG_10154 | 1.94  | 2E-03 | MYND domain zinc finger protein             | 104.6 | 27.3 |
| PI_03chr2253 | PITG_01614 | 0.67  | 2E-03 | Sodium/hydrogen exchanger                   | 39.6  | 24.9 |
| PI_03chr0200 | PITG_15961 | 0.93  | 2E-03 | none                                        | 32.2  | 16.9 |
| PI_04chr0062 | PITG_16245 | 2.55  | 2E-03 | none                                        | 35.8  | 6.1  |
| PI_02chr3931 | PITG_00845 | 1.57  | 2E-03 | Cyclic nucleotide phosphodiesterase         | 25.2  | 8.5  |
| PI_02chr1641 | PITG_03811 | 1.32  | 3E-03 | none                                        | 118.2 | 47.4 |
| PI_09chr0230 | PITG_10686 | 1.06  | 3E-03 | none                                        | 4.0   | 1.9  |
| PI_03chr0712 | PITG_21505 | 2.49  | 3E-03 | none                                        | 21.1  | 3.8  |
| PI_04chr0744 | PITG_10271 | 0.92  | 3E-03 | none                                        | 10.6  | 5.6  |
| PI_03chr2274 | PITG_01591 | 0.73  | 3E-03 | Nucleopore protein                          | 72.4  | 43.6 |
| PI_12chr0715 | PITG_18648 | -0.72 | 3E-03 | Proteasome regulator ADRM1                  | 15.5  | 25.5 |
| PI_03chr2028 | PITG_01821 | 0.74  | 3E-03 | Rab-GAP TBC domain-containing protein       | 29.4  | 17.6 |
| PI_12chr0092 | PITG_08136 | -0.57 | 3E-03 | Bromodomain acetyl lysine binding protein   | 23.3  | 34.6 |
| PI_03chr1370 | PITG_02050 | 2.22  | 3E-03 | Glycosyl transferase                        | 34.8  | 7.5  |
| PI_12chr1417 | PITG_06171 | -0.39 | 3E-03 | U2 snRNP spliceosome subunit                | 35.9  | 47.1 |
| PI_11chr0409 | PITG_14550 | 1.27  | 3E-03 | Tudor domain RNA-binding protein            | 11.1  | 4.6  |
| PI_03chr1037 | PITG_09997 | 0.55  | 3E-03 | Cytidylyl phosphotransferase                | 23.0  | 15.7 |
| PI_03chr2040 | PITG_01811 | 0.83  | 3E-03 | none                                        | 8.8   | 4.9  |
| PI_09chr0319 | PITG_10768 | 1.66  | 3E-03 | DNA-binding zinc finger protein             | 25.6  | 8.1  |
| PI_03chr2190 | PITG_01674 | 0.45  | 3E-03 | P-loop protein                              | 36.0  | 26.4 |
| PI_06chr1749 | PITG_05233 | 0.74  | 3E-03 | CLIP-associating protein                    | 35.8  | 21.5 |
| PI_03chr1288 | PITG_10164 | 0.55  | 3E-03 | Sir1 histone deacetylase                    | 20.3  | 13.9 |
| PI_03chr1259 | PITG_10153 | 2.3   | 3E-03 | none                                        | 169.1 | 34.3 |

|              |            |       |       |                                          |        |       |
|--------------|------------|-------|-------|------------------------------------------|--------|-------|
| PI_01chr1408 | PITG_11029 | 0.64  | 3E-03 | DNAJ-class protein chaperone             | 53.8   | 34.5  |
| PI_02chr2850 | PITG_18045 | 0.59  | 3E-03 | MAP kinase-activated protein kinase      | 102.5  | 68.1  |
| PI_02chr3904 | PITG_00867 | 0.58  | 3E-03 | LA motif RNA binding protein             | 47.5   | 31.8  |
| PI_03chr1045 | PITG_10002 | 1.17  | 3E-03 | Leucine zipper transcription factor      | 51.3   | 22.8  |
| PI_06chr1269 | PITG_05328 | 0.98  | 3E-03 | Ankyrin-like protein                     | 66.8   | 33.9  |
| PI_12chr0671 | PITG_22839 | -0.61 | 3E-03 | SMC chromosome segregation protein       | 23.9   | 36.5  |
| PI_03chr0310 | PITG_08311 | 1.28  | 3E-03 | none                                     | 1276.7 | 525.7 |
| PI_11chr0343 | PITG_21331 | 0.6   | 3E-03 | none                                     | 23.2   | 15.3  |
| PI_03chr0312 | PITG_08312 | 1.26  | 3E-03 | Tyr protein kinase                       | 116.2  | 48.5  |
| PI_0366c004  | PITG_22487 | 0.65  | 3E-03 | RNA binding factor subunit               | 9.0    | 5.8   |
| PI_075Fc004  | PITG_03695 | 1.43  | 4E-03 | none                                     | 1062.9 | 394.5 |
| PI_09chr0315 | PITG_10764 | 1.51  | 4E-03 | none                                     | 17.4   | 6.1   |
| PI_12chr0540 | PITG_07903 | -0.59 | 4E-03 | 26S proteasome regulatory subunit 8      | 69.9   | 105.2 |
| PI_04chr1272 | PITG_17391 | 0.9   | 4E-03 | Heat shock transcription factor          | 7.0    | 3.7   |
| PI_0137c017  | PITG_19674 | 0.67  | 4E-03 | none                                     | 12.0   | 7.6   |
| PI_03chr0118 | PITG_15891 | 0.88  | 4E-03 | Palmitoyltransferase                     | 57.4   | 31.2  |
| PI_06chr1196 | PITG_00792 | 1.61  | 4E-03 | none                                     | 143.7  | 47.1  |
| PI_02chr1148 | PITG_04701 | 0.9   | 4E-03 | Heat shock transcription factor          | 38.9   | 20.8  |
| PI_02chr1506 | PITG_03943 | 2.04  | 4E-03 | Methyltransferase domain protein         | 48.0   | 11.7  |
| PI_02chr2642 | PITG_03104 | 0.6   | 4E-03 | Choline transporter                      | 77.1   | 50.8  |
| PI_0387c007  | PITG_06759 | 0.73  | 4E-03 | none                                     | 40.8   | 24.6  |
| PI_04chr0834 | PITG_10375 | 4.16  | 4E-03 | none                                     | 84.3   | 4.7   |
| PI_06chr1105 | PITG_00718 | 0.77  | 4E-03 | Sir2 histone deacetylase                 | 12.9   | 7.5   |
| PI_15chr0204 | PITG_15670 | 2.02  | 4E-03 | Rab5 effector protein                    | 16.4   | 4.1   |
| PI_02chr3146 | PITG_01079 | 1.14  | 4E-03 | Rab 5 effector protein                   | 5.7    | 2.6   |
| PI_03chr0138 | PITG_15906 | 0.84  | 4E-03 | DNA repair protein RAD51                 | 58.9   | 32.9  |
| PI_03chr1667 | PITG_01949 | 0.58  | 4E-03 | Glycosyl hydrolase                       | 8.4    | 5.6   |
| PI_03chr0072 | PITG_15846 | 1.29  | 5E-03 | none                                     | 159.5  | 65.2  |
| PI_03chr1343 | PITG_02027 | 0.63  | 5E-03 | E3 ubiquitin-protein ligase              | 31.3   | 20.2  |
| PI_03chr2091 | PITG_01761 | 1.25  | 5E-03 | Proline dehydrogenase                    | 89.3   | 37.5  |
| PI_03chr1183 | PITG_10117 | 0.68  | 5E-03 | ABC transporter                          | 41.7   | 26.0  |
| PI_03chr1035 | PITG_09995 | 2.07  | 5E-03 | none                                     | 91.6   | 21.8  |
| PI_12chr0608 | PITG_07846 | -0.61 | 5E-03 | Glycylpeptide N-tetradecanoyltransferase | 65.2   | 99.5  |
| PI_02chr1147 | PITG_04702 | 0.88  | 5E-03 | Caspase 8-associated protein             | 65.9   | 35.8  |
| PI_07chr0522 | PITG_05929 | -0.95 | 5E-03 | GOLD domain transmembrane protein        | 10.5   | 20.4  |
| PI_12chr0289 | PITG_07995 | -0.6  | 5E-03 | Cyclin-dependent kinase                  | 18.3   | 27.8  |

|              |            |       |       |                                            |       |      |
|--------------|------------|-------|-------|--------------------------------------------|-------|------|
| PI_06chr1218 | PITG_00809 | 0.7   | 5E-03 | none                                       | 8.1   | 5.0  |
| PI_13chr0204 | PITG_16916 | 1.8   | 5E-03 | Serine/threonine protein kinase            | 78.3  | 22.5 |
| PI_02chr1788 | PITG_03523 | 0.4   | 5E-03 | Transcription factor IIH subunit 1         | 18.6  | 14.1 |
| PI_03chr1650 | PITG_01930 | 0.87  | 5E-03 | cAMP kinase regulatory subunit             | 34.2  | 18.7 |
| PI_11chr0343 | PITG_14605 | 0.56  | 5E-03 | none                                       | 36.3  | 24.6 |
| PI_02chr3954 | PITG_17238 | 0.53  | 5E-03 | none                                       | 11.1  | 7.7  |
| PI_09chr1662 | PITG_02204 | 1.28  | 5E-03 | Cyclic nucleotide phosphodiesterase        | 11.9  | 4.9  |
| PI_09chr0861 | PITG_02841 | 1.22  | 5E-03 | Cysteine protease                          | 54.3  | 23.3 |
| PI_02chr2437 | PITG_00971 | 0.75  | 6E-03 | none                                       | 16.9  | 10.0 |
| PI_03chr0786 | PITG_08613 | 1.1   | 6E-03 | Endoglucanase                              | 182.0 | 84.9 |
| PI_03chr2066 | PITG_01785 | 0.63  | 6E-03 | none                                       | 30.2  | 19.5 |
| PI_03chr2623 | PITG_16069 | 2.3   | 6E-03 | HSP100-class protein chaperone             | 138.7 | 28.2 |
| PI_04chr0717 | PITG_10239 | 0.92  | 6E-03 | Alpha-type protein kinase                  | 24.1  | 12.7 |
| PI_06chr1549 | PITG_05286 | 0.45  | 6E-03 | none                                       | 29.6  | 21.7 |
| PI_11chr0368 | PITG_14581 | 1.43  | 6E-03 | none                                       | 33.4  | 12.4 |
| PI_12chr0090 | PITG_08138 | -0.72 | 6E-03 | none                                       | 37.7  | 62.1 |
| PI_14chr0346 | PITG_13056 | -0.97 | 6E-03 | Mitochondrial carrier protein              | 24.9  | 48.9 |
| PI_04chr0834 | PITG_10370 | 4.19  | 6E-03 | none                                       | 66.0  | 3.6  |
| PI_11chr0886 | PITG_09723 | 0.9   | 6E-03 | Thioredoxin                                | 57.7  | 30.9 |
| PI_02chr3085 | PITG_01024 | 0.83  | 6E-03 | none                                       | 15.4  | 8.7  |
| PI_01chr1889 | PITG_00015 | 1.03  | 6E-03 | HTH DNA-binding protein                    | 25.4  | 12.5 |
| PI_03chr1700 | PITG_01923 | 0.35  | 6E-03 | PWWP histone methyl-lysine binding protein | 70.0  | 54.9 |
| PI_09chr0235 | PITG_10690 | 0.42  | 6E-03 | none                                       | 10.7  | 8.0  |
| PI_12chr1378 | PITG_06202 | 2.02  | 6E-03 | none                                       | 360.2 | 88.8 |
| PI_02chr2438 | PITG_00972 | 1.32  | 6E-03 | Aldehyde reductase                         | 35.0  | 14.0 |
| PI_03chr2341 | PITG_01525 | 0.66  | 6E-03 | none                                       | 120.8 | 76.5 |
| PI_06chr1556 | PITG_05291 | 0.99  | 6E-03 | Inward rectifier potassium channel         | 22.0  | 11.1 |
| PI_03chr0119 | PITG_19905 | 0.92  | 6E-03 | Serine/threonine protein kinase            | 61.0  | 32.2 |
| PI_12chr1379 | PITG_06201 | 1.93  | 6E-03 | TATA-box-binding protein TFIID             | 141.2 | 37.1 |
| PI_01chr4443 | PITG_12231 | 2.11  | 6E-03 | Diacylglycerol phosphatase                 | 99.7  | 23.1 |
| PI_06chr1544 | PITG_05278 | 0.62  | 6E-03 | PDH zinc finger protein                    | 10.1  | 6.6  |
| PI_03chr2137 | PITG_01719 | 0.42  | 6E-03 | Vacuolar sorting protein Vps39             | 48.7  | 36.4 |
| PI_01chr1843 | PITG_11264 | 0.8   | 6E-03 | none                                       | 42.8  | 24.6 |
| PI_03chr0119 | PITG_15892 | 0.98  | 6E-03 | Serine/threonine protein kinase            | 102.7 | 52.1 |
| PI_15chr0562 | PITG_15238 | 1.77  | 6E-03 | none                                       | 18.4  | 5.4  |
| PI_02chr2320 | PITG_03592 | 1.46  | 6E-03 | protein phosphatase regulatory subunit     | 88.6  | 32.2 |

|              |            |       |       |                                                   |       |       |
|--------------|------------|-------|-------|---------------------------------------------------|-------|-------|
| PI_02chr2319 | PITG_03593 | 1.55  | 6E-03 | Alanine aminotransferase                          | 235.2 | 80.3  |
| PI_12chr0965 | PITG_22394 | -0.62 | 6E-03 | EH domain protein                                 | 4.0   | 6.1   |
| PI_01chr4373 | PITG_12296 | 1.41  | 7E-03 | none                                              | 6.8   | 2.6   |
| PI_03chr1273 | PITG_10141 | 0.65  | 7E-03 | Adenylyl/guanylyl cyclase                         | 33.2  | 21.1  |
| PI_03chr2027 | PITG_01822 | 0.6   | 7E-03 | none                                              | 59.2  | 39.1  |
| PI_03chr2079 | PITG_01774 | 0.65  | 7E-03 | none                                              | 13.6  | 8.7   |
| PI_03chr2215 | PITG_01650 | 0.65  | 7E-03 | E3 ubiquitin-protein ligase                       | 10.6  | 6.8   |
| PI_03chr2250 | PITG_01617 | 0.58  | 7E-03 | none                                              | 43.6  | 29.2  |
| PI_03chr2270 | PITG_01599 | 0.49  | 7E-03 | Coronin actin family cytoskeletal protein         | 166.3 | 118.4 |
| PI_06chr1335 | PITG_18959 | 0.98  | 7E-03 | Serine/threonine protein kinase                   | 29.2  | 14.8  |
| PI_06chr1546 | PITG_05282 | 0.69  | 7E-03 | Phosphatidylinositol 4-phosphate 5-kinase         | 56.6  | 35.1  |
| PI_08chr0852 | PITG_01317 | 0.59  | 7E-03 | ABC-type protein kinase                           | 23.3  | 15.5  |
| PI_08chr0909 | PITG_01280 | -0.42 | 7E-03 | TOM1 family ubiquitin-binding protein             | 33.7  | 45.1  |
| PI_08chr0983 | PITG_01208 | -0.78 | 7E-03 | Thiolase                                          | 147.9 | 254.0 |
| PI_10chr1015 | PITG_05168 | 0.99  | 7E-03 | none                                              | 10.9  | 5.5   |
| PI_13chr0474 | PITG_15149 | 0.64  | 7E-03 | YSC84-like actin polymerization protein           | 55.8  | 35.8  |
| PI_13chr0539 | PITG_15085 | -0.68 | 7E-03 | none                                              | 4.1   | 6.6   |
| PI_14chr0404 | PITG_13014 | -1.18 | 7E-03 | rRNA binding protein                              | 83.6  | 189.5 |
| PI_04chr1016 | PITG_10488 | 2.01  | 7E-03 | Serine/threonine protein kinase                   | 13.6  | 3.4   |
| PI_0697c002  | PITG_16618 | 0.73  | 7E-03 | RNA binding factor subunit                        | 13.2  | 8.0   |
| PI_04chr0784 | PITG_10308 | 0.72  | 7E-03 | none                                              | 40.9  | 24.8  |
| PI_03chr0158 | PITG_15922 | 1.11  | 7E-03 | SMC chromosome segregation protein                | 20.9  | 9.7   |
| PI_12chr0810 | PITG_06656 | -0.64 | 7E-03 | ATP-binding protein                               | 4.1   | 6.4   |
| PI_03chr0198 | PITG_15959 | 0.72  | 7E-03 | none                                              | 43.1  | 26.2  |
| PI_14chr0016 | PITG_13178 | -1.07 | 7E-03 | Fatty acid elongase                               | 73.4  | 154.1 |
| PI_11chr0366 | PITG_14582 | 1.04  | 7E-03 | Phosphodiesterase                                 | 12.0  | 5.8   |
| PI_03chr2272 | PITG_01598 | 0.42  | 7E-03 | Mannose-binding protein                           | 67.0  | 50.1  |
| PI_03chr2427 | PITG_09544 | 1.48  | 7E-03 | none                                              | 18.5  | 6.6   |
| PI_03chr2284 | PITG_01580 | 0.43  | 7E-03 | Signal peptidase 25 kDa subunit                   | 89.7  | 66.6  |
| PI_02chr0579 | PITG_11792 | 0.86  | 8E-03 | none                                              | 160.4 | 88.4  |
| PI_04chr0280 | PITG_16495 | 1.54  | 8E-03 | ABC transporter                                   | 11.9  | 4.1   |
| PI_05chr1107 | PITG_14214 | 2.4   | 8E-03 | none                                              | 30.4  | 5.8   |
| PI_06chr0438 | PITG_00147 | 1.35  | 8E-03 | none                                              | 39.2  | 15.4  |
| PI_06chr0414 | PITG_00167 | 1.3   | 8E-03 | Cyclic nucleotide phosphodiesterase               | 47.3  | 19.2  |
| PI_12chr1307 | PITG_06272 | -0.66 | 8E-03 | ADP ribosylation factor GTPase-activating protein | 10.9  | 17.2  |

|              |            |       |       |                                                      |        |       |
|--------------|------------|-------|-------|------------------------------------------------------|--------|-------|
| PI_03chr0664 | PITG_08489 | 0.48  | 8E-03 | none                                                 | 30.0   | 21.5  |
| PI_06chr1570 | PITG_05303 | 0.59  | 8E-03 | none                                                 | 301.7  | 200.4 |
| PI_02chr3798 | PITG_00964 | 0.91  | 8E-03 | bZip transcription factor                            | 76.2   | 40.6  |
| PI_03chr2201 | PITG_01664 | 1.38  | 8E-03 | none                                                 | 33.0   | 12.7  |
| PI_03chr2628 | PITG_16074 | 2.03  | 8E-03 | HSP100-class protein chaperone                       | 106.5  | 26.1  |
| PI_07chr1360 | PITG_12578 | -1.09 | 8E-03 | Acyl-CoA desaturase                                  | 91.4   | 194.5 |
| PI_12chr0747 | PITG_06695 | -0.55 | 8E-03 | Serine/arginine-rich splicing factor 4               | 35.7   | 52.3  |
| PI_02chr3984 | PITG_17265 | 0.72  | 9E-03 | none                                                 | 9.9    | 6.0   |
| PI_02chr3778 | PITG_00989 | 0.67  | 9E-03 | Jumonji family transcription factor                  | 22.7   | 14.3  |
| PI_03chr2214 | PITG_01651 | 0.87  | 9E-03 | RAB-GTPase                                           | 36.0   | 19.7  |
| PI_08chr0010 | PITG_13441 | -0.32 | 9E-03 | Phosphatidylinositol 4-kinase                        | 7.7    | 9.6   |
| PI_03chr2283 | PITG_01581 | 0.37  | 9E-03 | Mitotic spindle assembly checkpoint protein<br>MAD2A | 52.7   | 40.7  |
| PI_0697c002  | PITG_12094 | 0.36  | 9E-03 | Serine/threonine protein kinase                      | 23.7   | 18.4  |
| PI_06chr0082 | PITG_16338 | 1.09  | 9E-03 | none                                                 | 61.1   | 28.7  |
| PI_14chr0281 | PITG_20412 | -1.4  | 9E-03 | Putative GPI-anchored elicitin protein               | 28.2   | 74.5  |
| PI_03chr2427 | PITG_20979 | 1.47  | 9E-03 | none                                                 | 13.0   | 4.7   |
| PI_03chr2364 | PITG_01508 | 0.46  | 9E-03 | GYF domain protein                                   | 55.7   | 40.5  |
| PI_09chr0941 | PITG_02776 | 1.01  | 9E-03 | Inositol phosphate phosphatase                       | 3.8    | 1.9   |
| PI_14chr1009 | PITG_17049 | 1.05  | 9E-03 | Multidrug resistance protein                         | 38.7   | 18.7  |
| PI_04chr0788 | PITG_10310 | 1.62  | 9E-03 | Histone 2A deubiquitinase                            | 38.4   | 12.5  |
| PI_04chr1013 | PITG_10486 | 1.39  | 9E-03 | DNA replication GINS complex protein                 | 9.2    | 3.5   |
| PI_12chr0727 | PITG_18641 | -0.41 | 9E-03 | none                                                 | 19.0   | 25.2  |
| PI_02chr0781 | PITG_17894 | 2.92  | 9E-03 | Zinc finger protein                                  | 62.3   | 8.2   |
| PI_03chr1090 | PITG_10040 | 0.96  | 9E-03 | none                                                 | 10.2   | 5.2   |
| PI_03chr2359 | PITG_01512 | 1.47  | 9E-03 | none                                                 | 12.2   | 4.4   |
| PI_075Fc031  | PITG_03753 | 0.86  | 9E-03 | E3 ubiquitin-protein ligase                          | 36.8   | 20.3  |
| PI_03chr2065 | PITG_01786 | 0.31  | 9E-03 | none                                                 | 21.1   | 17.0  |
| PI_05chr0600 | PITG_09194 | 2.6   | 9E-03 | Aquaporin                                            | 285.3  | 47.1  |
| PI_09chr0264 | PITG_10722 | 1.5   | 9E-03 | none                                                 | 29.8   | 10.5  |
| PI_11chr0746 | PITG_18001 | 0.83  | 9E-03 | Polyubiquitin                                        | 1107.4 | 622.9 |
| PI_03chr2104 | PITG_01749 | 0.36  | 9E-03 | 50S ribosomal protein L9                             | 22.2   | 17.3  |
| PI_08chr0977 | PITG_01217 | -1.03 | 1E-02 | 50S ribosomal protein L9                             | 44.8   | 91.5  |
| PI_09chr0774 | PITG_02921 | -0.48 | 1E-02 | tRNA synthetase                                      | 69.6   | 97.1  |
| PI_09chr0775 | PITG_02922 | -0.53 | 1E-02 | Polycystin cation channel protein                    | 35.1   | 50.7  |
| PI_03chr1375 | PITG_02055 | 0.68  | 1E-02 | TPR repeat protein                                   | 50.3   | 31.4  |

|              |            |      |       |                           |      |      |
|--------------|------------|------|-------|---------------------------|------|------|
| PI_06chr0227 | PITG_00214 | 0.34 | 1E-02 | none                      | 21.9 | 17.3 |
| PI_01chr3551 | PITG_06862 | 1.98 | 1E-02 | ABC transporter           | 99.8 | 25.3 |
| PI_02chr2116 | PITG_03265 | 0.49 | 1E-02 | Sodium/hydrogen exchanger | 15.6 | 11.1 |
| PI_09chr1180 | PITG_02566 | 0.56 | 1E-02 | Condensin                 | 10.5 | 7.1  |
| PI_02chr1947 | PITG_03416 | 0.57 | 1E-02 | Cysteine protease         | 63.4 | 42.7 |

---
